# Supplementary material
Source: PubMed Central journal article supplement (PMC2224213)
Supplement: pnas_0705713105_4.pdf [file pnas_0705713105_4.pdf]

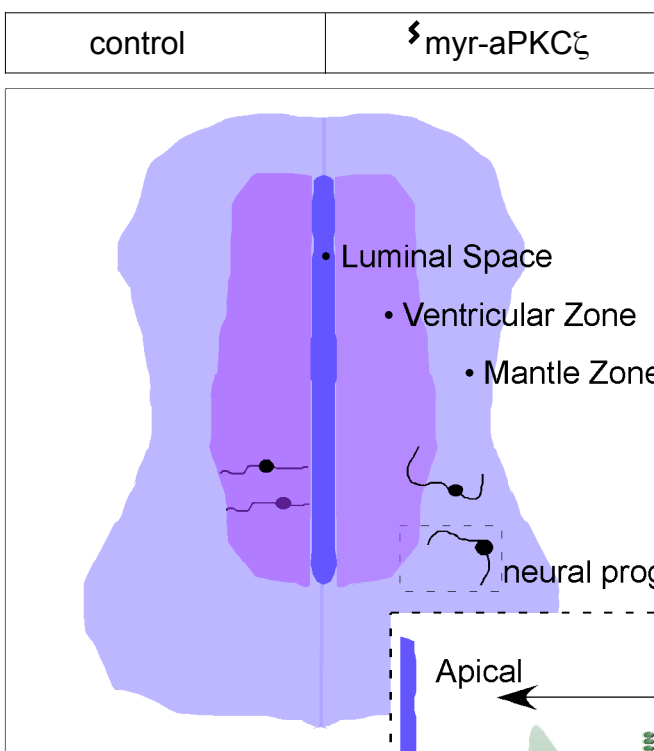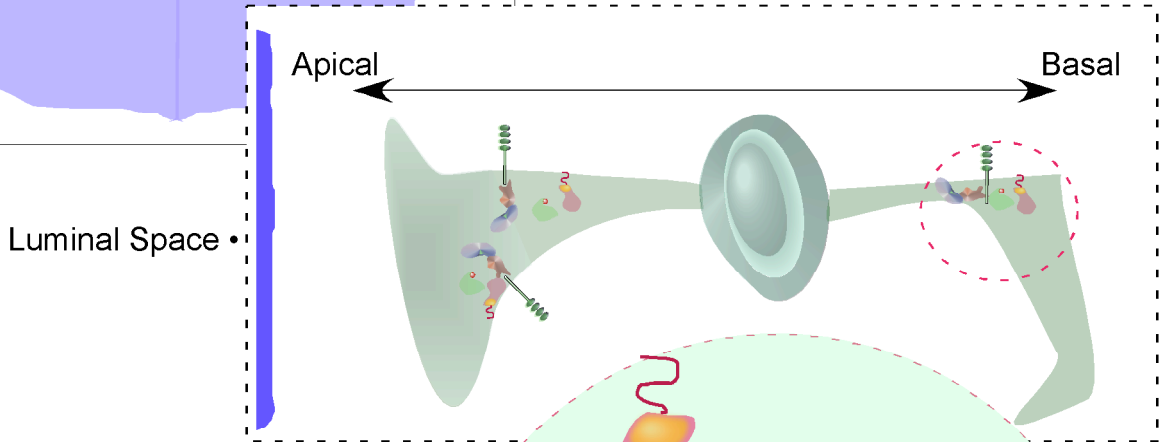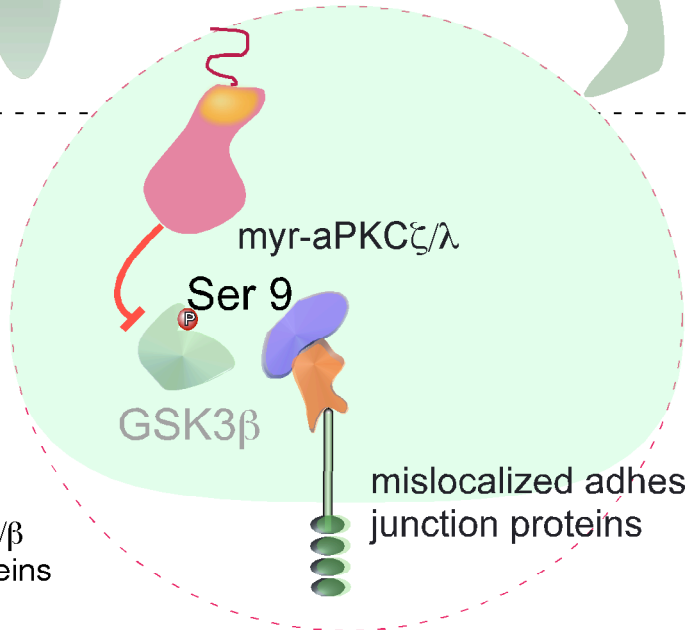

myr-aPKC $\zeta$  expressing progenitors

- apical compartmentalization of aPKC $\zeta/\lambda$  is squelched by myr-aPKC $\zeta$
- indiscriminate downregulation of GSK3 $\alpha/\beta$  and stabilization of adhesion junction proteins throughout the entire apical-basal axis
