# Supplementary material
Source: PubMed Central journal article supplement (PMC2224213)

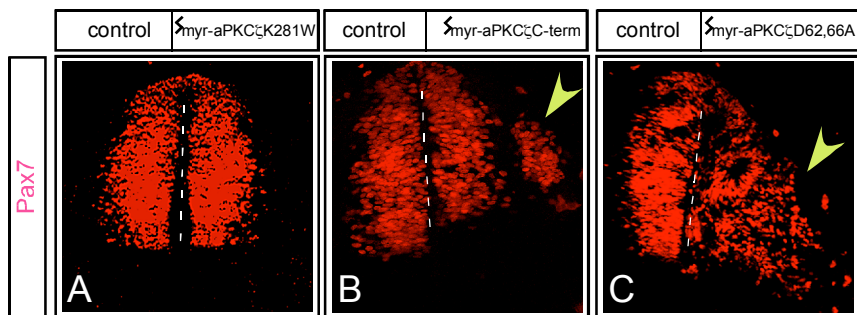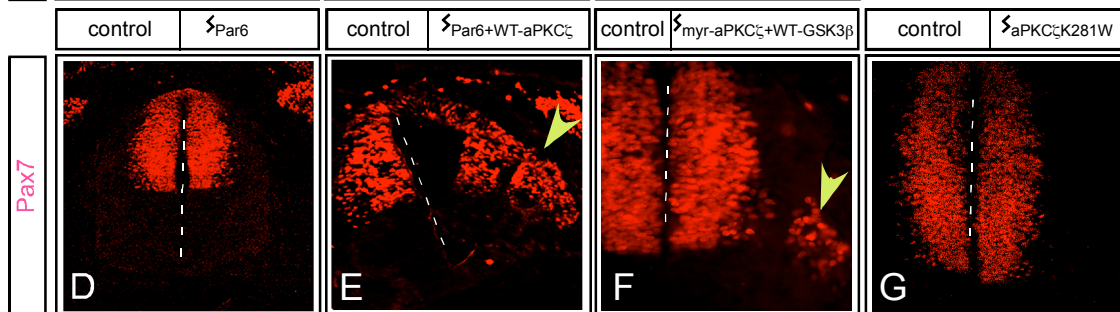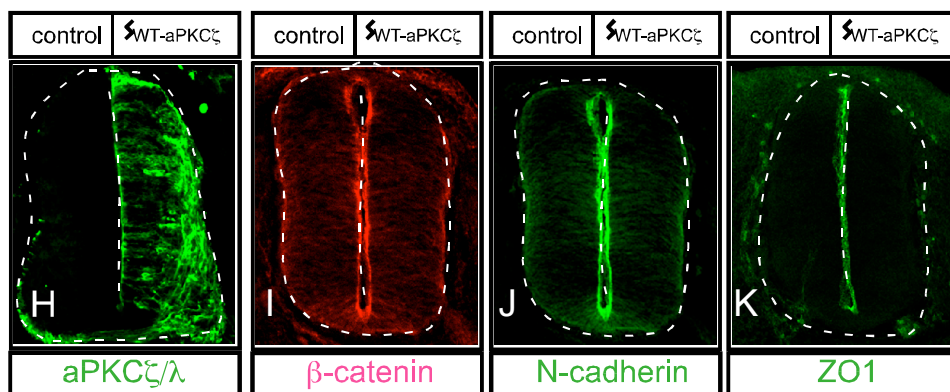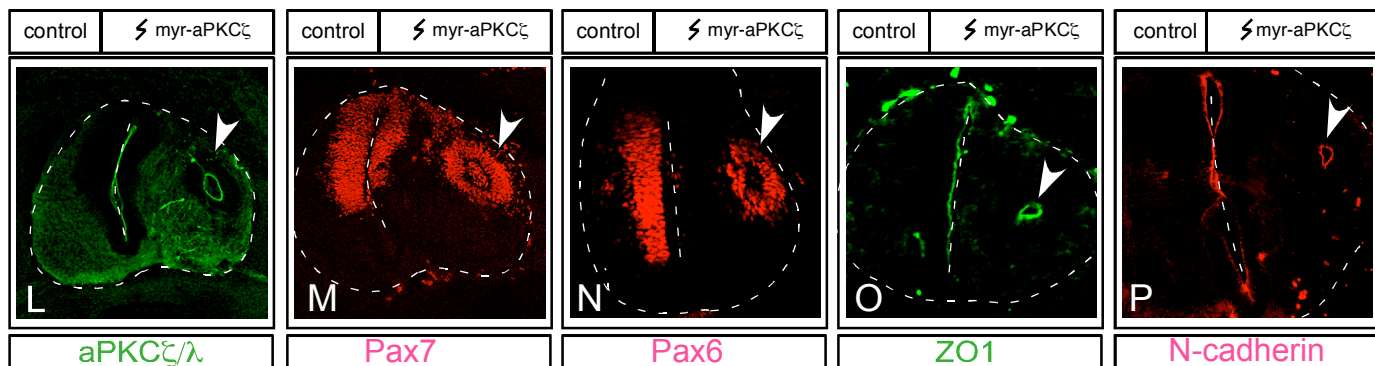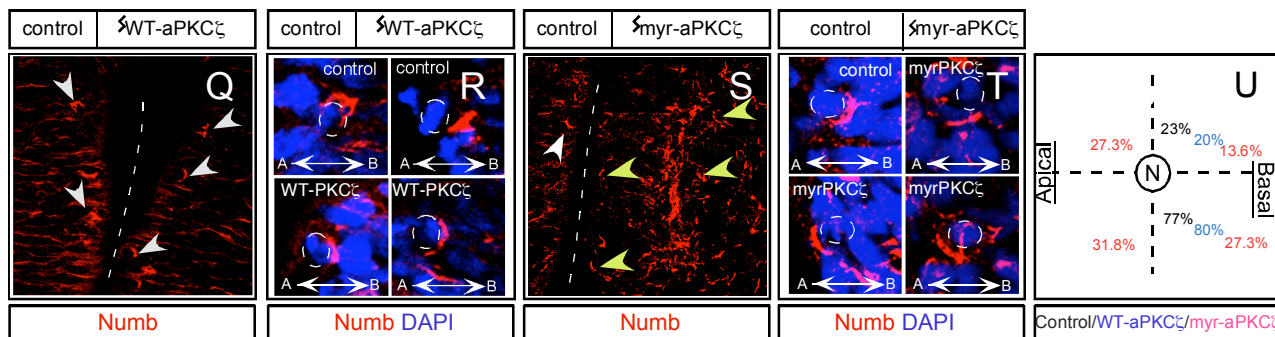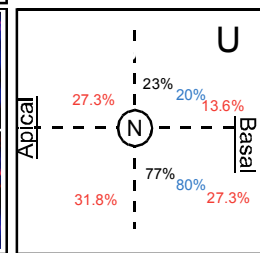

Supplement: pnas_0705713105_1.pdf [file pnas_0705713105_1.pdf]

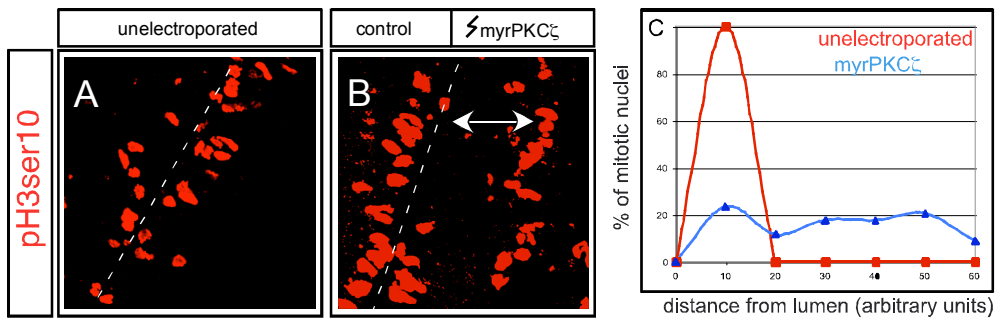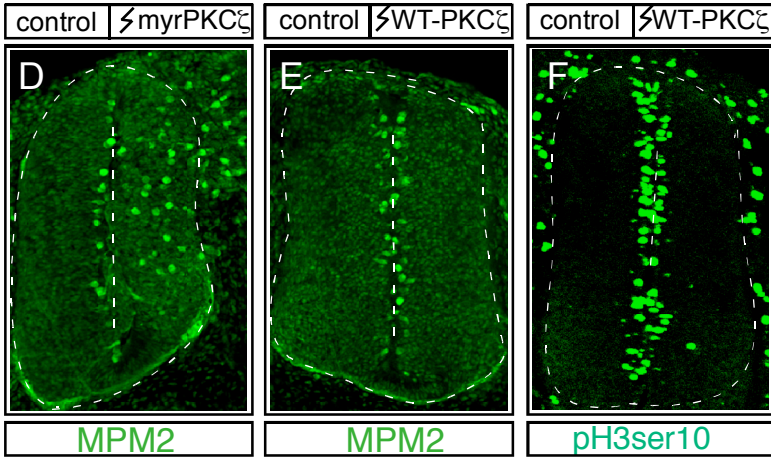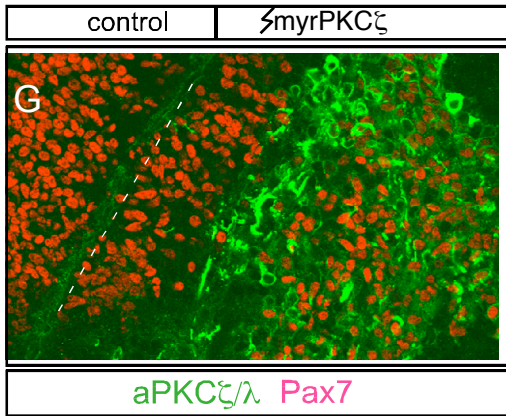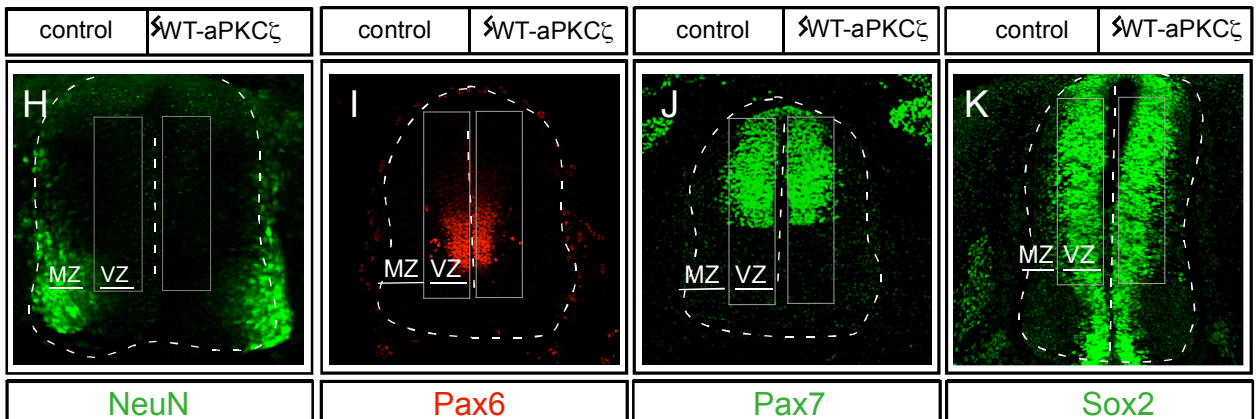

Supplement: pnas_0705713105_2.pdf [file pnas_0705713105_2.pdf]

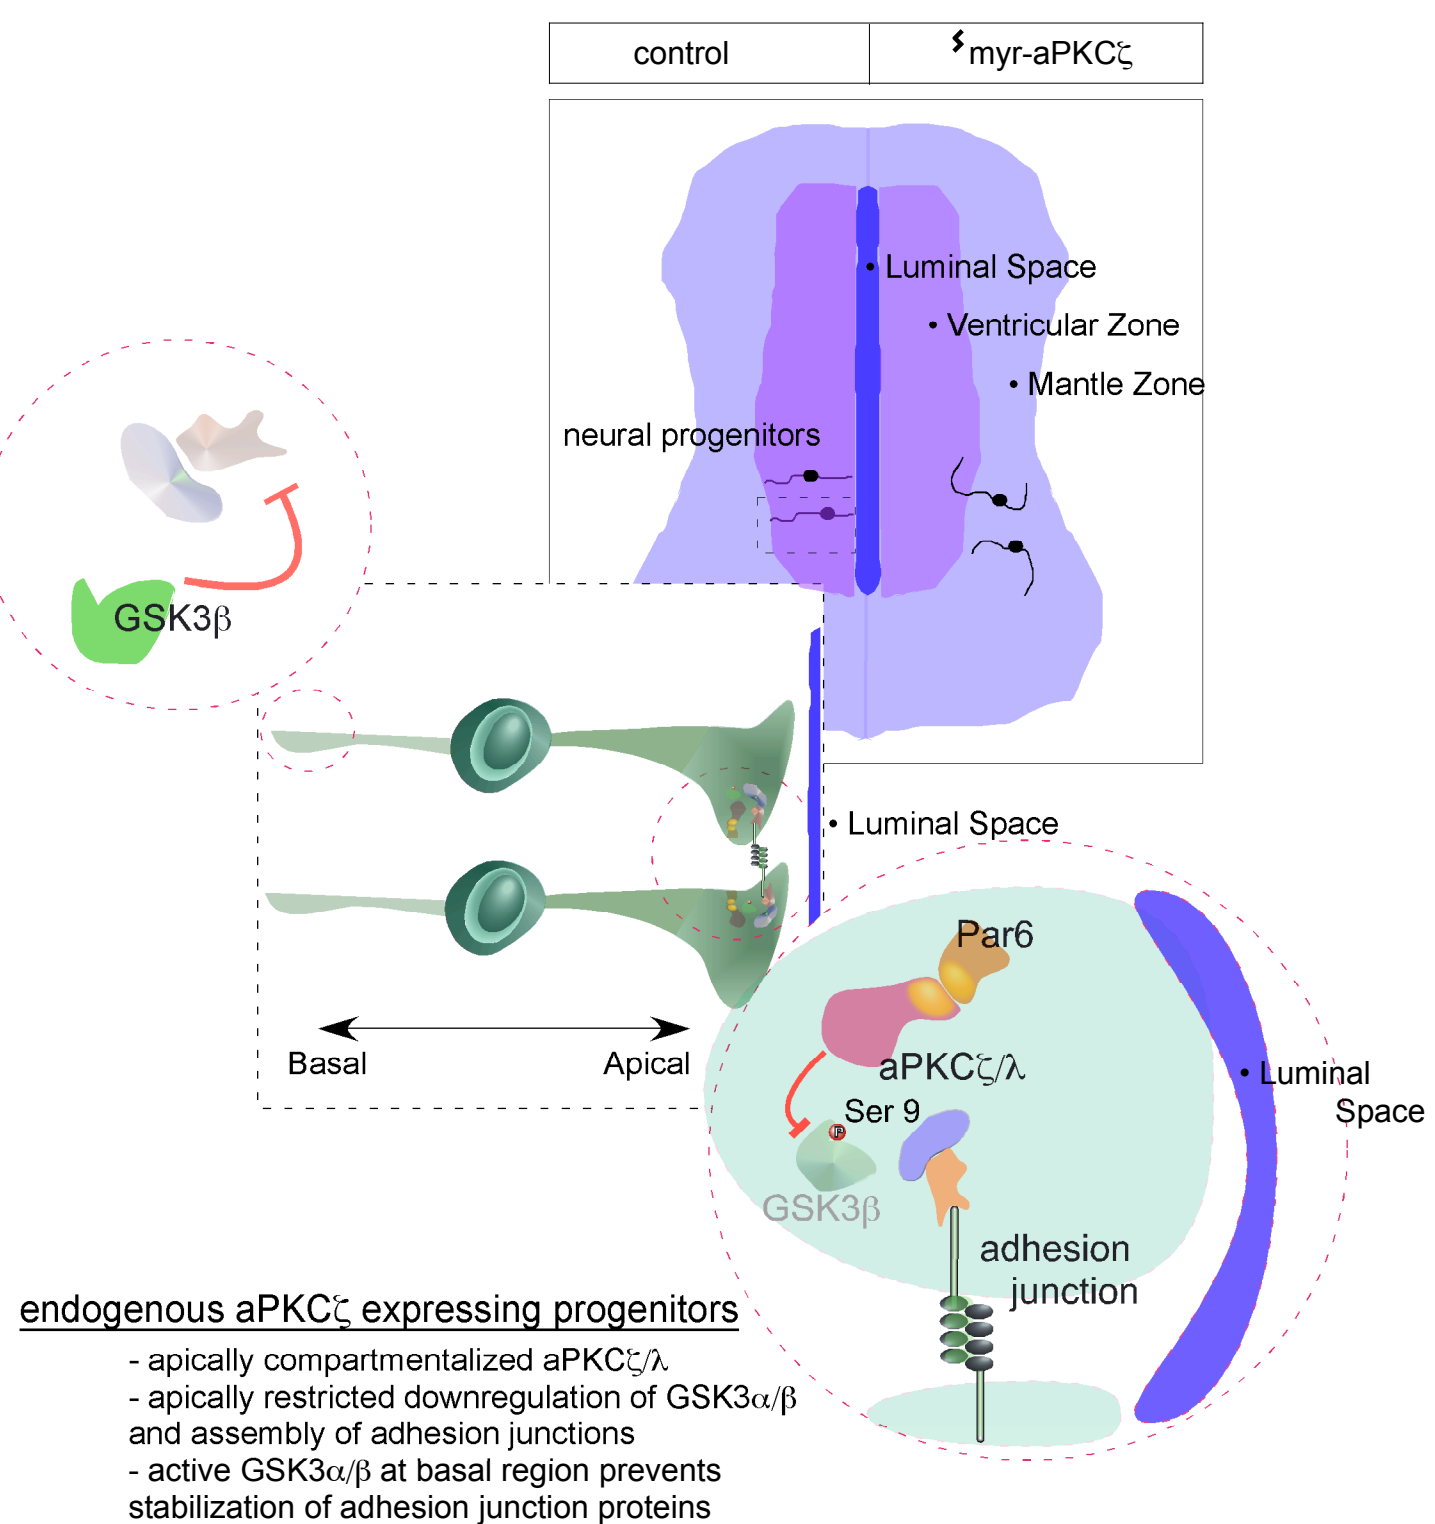

Supplement: pnas_0705713105_3.pdf [file pnas_0705713105_3.pdf]
